# Supplementary material for: Triggering the electrocatalytic hydrogen evolution activity of the inert two-dimensional MoS2 surface via single-atom metal doping
Source: Royal Society of Chemistry journal article supplement (doi:10.1039/c5ee00751h), 2015-01-01
Supplement: c5ee00751h1.pdf [file c5ee00751h1.pdf]

## Supporting Information

### **Arousing the electrocatalytic hydrogen evolution activity of inert two-dimensional MoS<sub>2</sub> surface via single-atom metal doping**

Jiao Deng<sup>†1</sup>, Haobo Li<sup>†1</sup>, Jianping Xiao<sup>1</sup>, Yunchuan Tu<sup>1</sup>, Dehui Deng<sup>\*1</sup>, Huaixin Yang<sup>2</sup>, Huanfang Tian<sup>2</sup>, Jianqi Li<sup>2</sup>, Pengju Ren<sup>1</sup>, Xinhe Bao<sup>\*1</sup>

<sup>1</sup>State Key Laboratory of Catalysis, *i*ChEM, Dalian Institute of Chemical Physics, Chinese Academy of Sciences, Dalian, 116023, China.

<sup>2</sup>Beijing National Laboratory for Condensed Matter Physics, Institute of Physics, Chinese Academy of Sciences, Beijing 100190, China.

<sup>†</sup>These authors have contributed equally.

\*E-mail: dhdeng@dicp.ac.cn; xhbao@dicp.ac.cn; Fax: +86-411-84379128; Tel: +86-411-84686637.

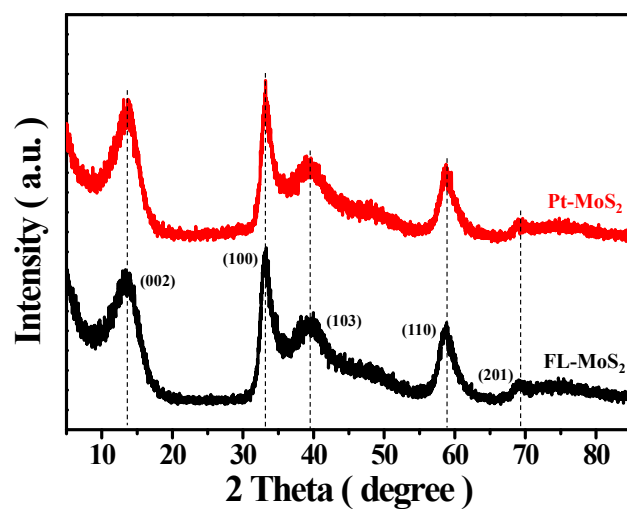

**Figure S1.** XRD patterns of Pt-MoS<sub>2</sub> in comparison to pure few-layer MoS<sub>2</sub> nanosheets (FL-MoS<sub>2</sub>). The result showed no Pt-containing crystal phases involved in the Pt-MoS<sub>2</sub> samples.

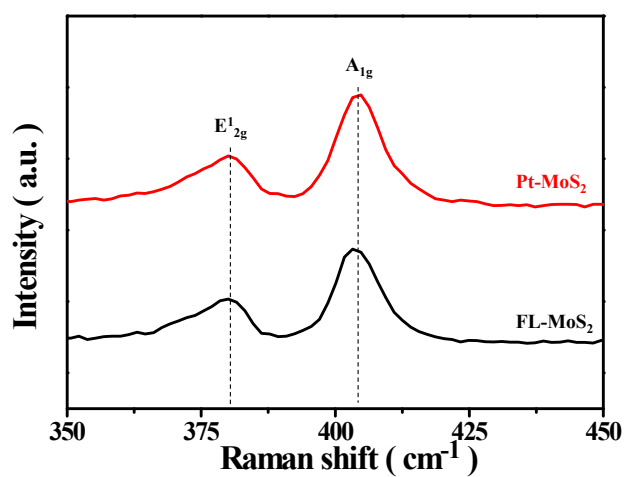

**Figure S2.** Raman spectra of Pt-MoS<sub>2</sub> in comparison to pure few-layer MoS<sub>2</sub> nanosheets (FL-MoS<sub>2</sub>).

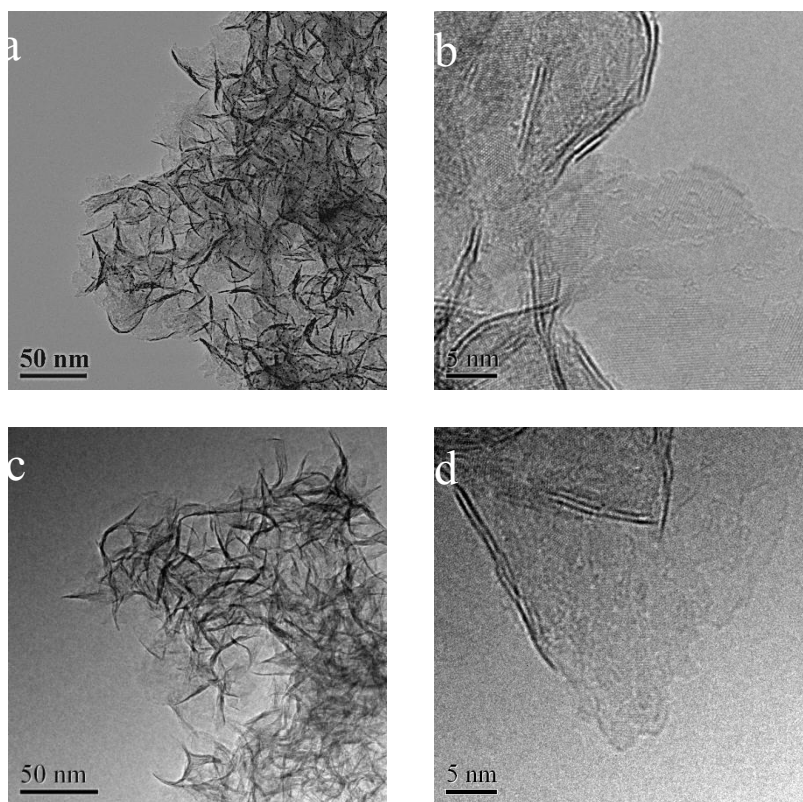

**Figure S3.** (a-b) TEM images of pure few-layer MoS<sub>2</sub> nanosheets (FL-MoS<sub>2</sub>). (c-d) TEM images of Pt-MoS<sub>2</sub>.

In order to confirm the doping and adsorption configuration for metal atoms doped MoS<sub>2</sub>, periodically repeated single trilayer MoS<sub>2</sub> crystal models have been used. The Pt atom doping is adopted as an example and four possible cases have been taken into account, as shown in Fig. S4 for the optimized results. a-d are the substitutional doping cases: a-b are Pt atoms replacing Mo atoms, while c-d are Pt atoms replacing S atoms. e-h are the supported cases: e-f are corresponding to Pt atoms above Mo atoms, while g-h are Pt atoms above hollow sites. The formation energy ( $E_f$ ) for these different structures has also been calculated to evaluate their structural stability, which is calculated as:  $E_f = E_{tot} - E_0[\text{MoS}_2] - E_i$ , where  $E_{tot}$  is the total energy for MoS<sub>2</sub> with doped or supported metal atoms. In the cases of metal doped MoS<sub>2</sub>,  $E_0[\text{MoS}_2]$  is the energy for MoS<sub>2</sub> with one Mo or S vacancy, while for the cases of metal supported on MoS<sub>2</sub>,  $E_0[\text{MoS}_2]$  is the energy for perfect MoS<sub>2</sub>.  $E_i$  is the energy of one metal atom referred to its bulk metal.

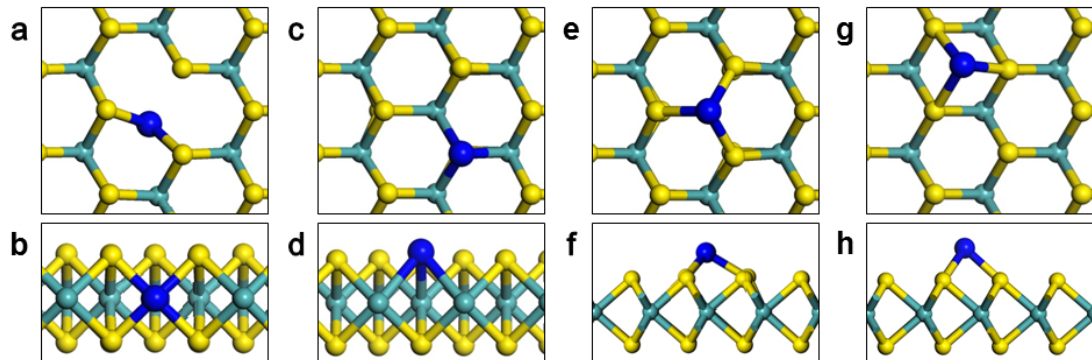

**Figure S4.** Optimized atomic configurations of Pt atoms in MoS<sub>2</sub> two-dimensional structures: top view and side view of Pt atom doping into the Mo site (a-b); top view and side view of Pt atom doping into the S site (c-d); top view and side view of Pt atom supported just above the Mo atom (e-f); top view and side view of Pt atom supported above the hollow site (g-h).

According to the calculated results, when Pt atoms replace Mo atoms or S atoms, the  $E_f$  are -2.22 eV and 0.42 eV, while the  $E_f$  are 2.82 eV and 3.41 eV for Pt atoms supported above Mo atoms or hollow sites, respectively. One can see that the case in Fig. S4a-b is the most likely doping configuration, while the case in Fig. S4e-f shows

the best supporting configuration but Pt atoms are easy to agglomerate when they just monodisperse on MoS<sub>2</sub>. Thus, the doping configurations are more likely to form with respect to the supported configurations.

The descriptor of HER activity, adsorption free energy of H\* ( $\Delta G_{H^0}$ ), can be obtained by correcting the adsorption energy of H\*. The differential binding energy is often used to describe the stability of H atoms, which is defined by:  $\Delta E_H = E(\text{MoS}_2 + \text{H}) - E(\text{MoS}_2) - 1/2E(\text{H}_2)$ , where  $E(\text{MoS}_2 + \text{H})$  is the total energy for the metal atoms doped or supported MoS<sub>2</sub> catalysts with one absorbed H atom,  $E(\text{MoS}_2)$  represents the total energy for the catalyst without H atoms, and  $E(\text{H}_2)$  is the energy of a gas phase hydrogen molecule. For metal catalysts,  $\Delta G_{H^0}$  has used to be roughly calculated as:  $\Delta G_{H^0} = \Delta E_H + 0.24 \text{ eV}$ <sup>1</sup>, which is taken for the following calculations.

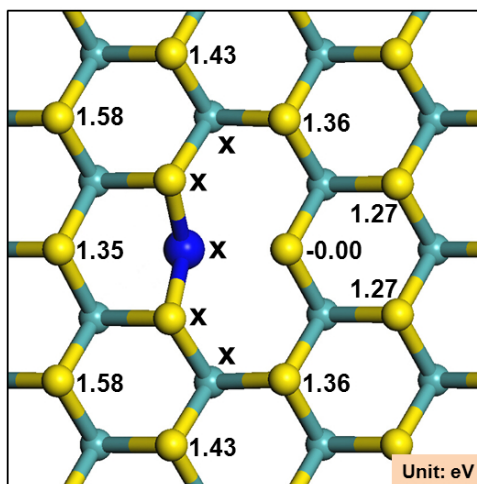

**Figure S5.** Calculated adsorption free energy of H\* ( $\Delta G_{H^0}$ ) on S and Pt atoms of different sites (in units of eV). The sites marked with 'x' indicate that H atoms cannot adsorb on them. The green, yellow, blue spheres represent Mo, S, Pt atoms, respectively.

As shown in Fig. S5, Pt atom doping can affect the adsorption free energy of H\* ( $\Delta G_{H^0}$ ) on its surrounding S atoms. For the coordinatively unsaturated S atom neighboring to the Pt atom, the free energy is around 0 eV, while for other S atoms

around, the free energy is still higher than +1.0 eV. Moreover, H atoms cannot adsorb on the doped Pt atom. Thus, it indicates that the active sites are not the doped Pt atoms, but the coordinatively unsaturated S atoms neighboring to them, resulting in the prior adsorption sites for H atoms.

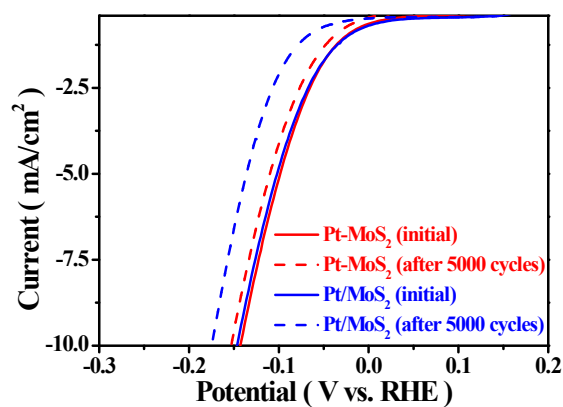

**Figure S6.** HER polarization curves of Pt-MoS<sub>2</sub> recorded initially and after 5000 CV sweeps between -0.13 V and +0.57 V (vs. RHE) in comparison with that of Pt/MoS<sub>2</sub>.

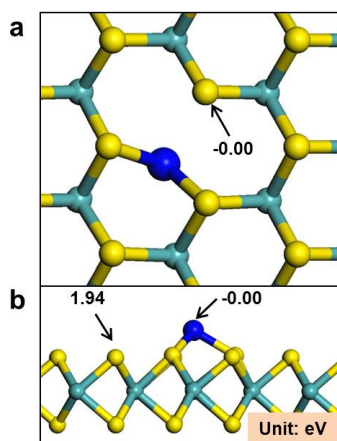

**Figure S7.** Calculated adsorption free energy of H\* ( $\Delta G_{H^0}$ ) on S and Pt atoms for Pt doped MoS<sub>2</sub> (a) and Pt supported on MoS<sub>2</sub> (b). The green, yellow, blue spheres represent Mo, S, and Pt atoms, respectively.

It can be seen that in the doped case, owing to the steric hindrance, the H atom cannot adsorb on the doped Pt atom, while the prior adsorption site is the neighboring unsaturated S atom with  $\Delta G_{H^0}$  of about 0 eV. In the supported case, the prior adsorption site is the Pt atom with  $\Delta G_{H^0}$  of also about 0 eV. These results indicate that H atom would own the similar adsorption ability in both the doped and supported cases, resulting in a similar HER activity.

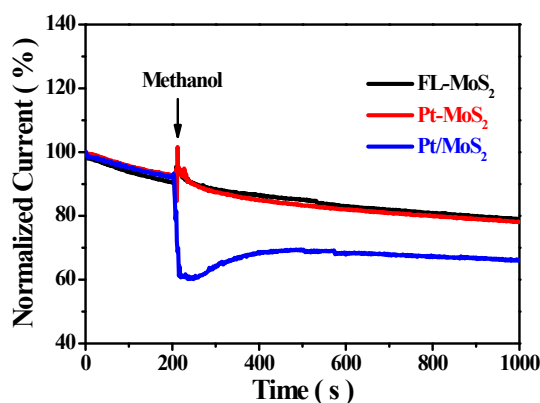

**Figure S8.** Chronoamperometric responses in the O<sub>2</sub>-saturated 1 M NaOH at -0.25 V (vs. Hg/HgO) for FL-MoS<sub>2</sub>, Pt-MoS<sub>2</sub> and Pt/MoS<sub>2</sub>. 10% (v/v) methanol was injected into the electrolyte solution at 200 s.

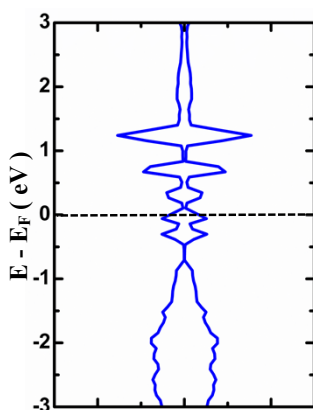

**Figure S9.** Projected density of states (PDOS) for the doped Pt atoms of the Pt-MoS<sub>2</sub>. The position of the Fermi level is as shown in dashed lines.

It can be obviously seen that there are some hybridized electronic states from both Pt and S (as shown in Fig. 3) around the Fermi level of doped Pt atoms. Therefore, the stimulating activity of Pt-MoS<sub>2</sub> can be attributed to the hybridized Pt and S electronic states of the Pt-MoS<sub>2</sub>.

**Table S1.** Formation energy ( $E_f$ ) and adsorption free energy of H\* ( $\Delta G_{H^*}^0$ ) for varied metal atoms doped MoS<sub>2</sub>.

| Metal | $E_f$ (eV) | $\Delta G_{H^*}^0$ (eV) |
|-------|------------|-------------------------|
| Pt    | -2.22      | -0.00                   |
| Co    | -3.17      | -0.07                   |
| Ni    | -2.42      | -0.28                   |
| Mo    | —          | 1.83                    |

## References

1. J. K. Nørskov, T. Bligaard, A. Logadottir, J. R. Kitchin, J. G. Chen, S. Pandelov and J. K. Nørskov, *J. Electrochem. Soc.*, 2005, **152**, J23-J26.
